# Supplementary material for: Continuity in general practice and hospitalization patterns: an observational study
Source: Springer Nature journal article supplement (doi:10.1186/s12875-020-01361-0), 2021-01-14
Supplement: MOESM1 [file 18768236]

## Supplement 1

| <b>Supplemental Table 1. List of ICD 10-GM Codes Used to Identify Hospitalizations for Ambulatory Care–Sensitive Conditions</b> |                                                                                                   |
|---------------------------------------------------------------------------------------------------------------------------------|---------------------------------------------------------------------------------------------------|
| <b><i>Ambulatory Care Sensitive Condition</i></b>                                                                               | <b><i>ICD10-GM Code</i></b>                                                                       |
| Angina                                                                                                                          | I20, I24.0, I24.8, I24.9                                                                          |
| Asthma                                                                                                                          | J45, J46                                                                                          |
| Cellulitis                                                                                                                      | L03, L04, L08.0, L08.8, L08.9, L88, L98.0                                                         |
| Congestive heart failure                                                                                                        | I11.0, I50, J81                                                                                   |
| Convulsion and epilepsy                                                                                                         | G40, G41, R56, O15                                                                                |
| Chronic obstructive pulmonary disease                                                                                           | J20, J41, J42, J43, J47                                                                           |
| Dehydration and gastroenteritis                                                                                                 | E86, K52.2, K52.8, K52.9                                                                          |
| Dental conditions                                                                                                               | A69.0, K02, K03, K04, K05, K06, K08, K09.8, K09.9, K12, K13                                       |
| Diabetes complications                                                                                                          | E10.0–E10.8, E11.0–E11.8, E12.0–E12.8, E13.0–E13.8, E14.0–E14.8                                   |
| Ear, nose and throat infections                                                                                                 | H66, H67, J02, J03, J06, J31.2                                                                    |
| Gangrene                                                                                                                        | R02                                                                                               |
| Hypertension                                                                                                                    | I10, I11.9                                                                                        |
| Influenza and pneumonia                                                                                                         | J10, J11, J13, J14, J15.3, J15.4, J15.7, J15.9, J16.8, J18.1, J18                                 |
| Iron-deficiency anemia                                                                                                          | D50.1, D50.8, D50.9                                                                               |
| Nutritional deficiency                                                                                                          | E40, E41, E42, E43, E55.0, E64.3                                                                  |
| Other vaccine preventable diseases                                                                                              | A35, A36, A37, A80, B05, B06, B16.1, B16.9, B18.0, B18.1, B26, G00.0, M01.4                       |
| Pelvic inflammatory disease                                                                                                     | N70, N73, N74                                                                                     |
| Perforated/bleeding ulcer                                                                                                       | K25.0–K25.2, K25.4–K25.6, K26.0–K26.2, K26.4–K26.6, K27.0–K27.2, K27.4–K27.6, K280–282, K284–K286 |
| Pyelonephritis                                                                                                                  | N10, N11, N12, N13.6                                                                              |
| Alcohol-related diseases                                                                                                        | F10                                                                                               |
| Atrial fibrillation and flutter                                                                                                 | I47.1, I47.9, I49.5, I49.8, I49.9, R00.0, R002, R00.8                                             |
| Constipation                                                                                                                    | K59.0                                                                                             |
| Fractured proximal femur                                                                                                        | S72.0, S72.1, S72.2                                                                               |
| Dyspepsia and other stomach function disorders                                                                                  | K30, K21                                                                                          |
| Hypokalemia                                                                                                                     | E87.6                                                                                             |
| Migraine/acute headache                                                                                                         | G43, G44.0, G44.1, G44.3, G44.4, G44.8, R51x                                                      |
| ICD-10-GM = International Classification of Diseases-, 10 <sup>th</sup> Revision – German Modification.                         |                                                                                                   |
